# Supplementary material
Source: PubMed Central journal article supplement (PMC2763207)
Supplement: NIHMS130201-supplement-01.pdf [file NIHMS130201-supplement-01.pdf]

## Supporting online material

### Materials and Methods

*Gene synthesis, mutagenesis and screening.* A gene encoding IFP1.0 with codons optimized for *Escherichia coli* was synthesized by overlap extension PCR (S1). Genetic libraries were constructed by saturation and random mutagenesis as described (S2) and DNA shuffling (S3). IFP1.0 and mutants were cloned into a modified pBAD vector containing the heme oxygenase-1 gene from cyanobacteria. Libraries were expressed and screened as described (S2). A 676 nm laser was used for FACS screening of large libraries, with 710 – 900 nm emission filter.

*Protein expression and characterization.* IFPs in the modified pBAD vector were expressed in *E. coli* strain TOP10. Protein purification, fluorescence characterization and photobleaching experiments were done as described (S2). For quantum yield determinations, the integral of the emission spectrum (corrected for the wavelength-dependence of detection sensitivity) of a solution of IFP in PBS was compared with the analogous integral for an equally absorbing solution of Cy5 in PBS, whose quantum yield was assumed to be 0.27 (S4). For extinction coefficient determination, the holoprotein concentration was calculated based on the assumption that the extinction coefficient of holoprotein at 388 nm was equal to that of free BV, which was measured to be 39,900  $M^{-1} cm^{-1}$  in PBS. This is based on the result that the absorbance by the Q band (670 – 700 nm) decreased by ~ 10 fold after denaturation while the absorbance at 388 nm did not change.

*Chimera construction and imaging.* DNA encoding IFP1.0 with codons optimized for mammals was synthesized by overlap extension PCR (SI). Other IFPs were created by QuickChange Multi site-directed mutagenesis. AKT1's PH domain was fused to the c-terminus of IFP1.4 to generate chimeras IFP1.4-PH<sup>AKT1</sup>. All the IFPs and chimera were cloned into pcDNA3.1 vector. HEK293A cells were transfected with IFP cDNAs using Fugene, then imaged 24-48 hr later on a Zeiss Axiovert microscope with redshifted Cy5.5 filter set (Chroma) and a cooled CCD camera (Photometrics, Tucson, AZ), controlled by MetaFluor 2.75 software (Universal Imaging, West Chester, PA).

*Adenovirus construction.* To create adenoviruses expressing IFP1.1 or mKate and GFP, a transcription unit comprising the IFP1.1 or mKate coding sequence, the poliovirus IRES, and GFP was constructed by assembly PCR, cloned into pENTR1a (Invitrogen), and transferred into pAd-CMV-DEST (Invitrogen) by Gateway recombinase (Invitrogen). Viruses were produced in HEK293 cells by transfection followed by one round of amplification, purified by anion exchange chromatography (FastTrap purification kit, Millipore), resuspended in HBSS + 10% glycerol, and stored in aliquots at -80°C. Titers as assessed on HEK293 cells by GFP fluorescence were  $5 \times 10^{10}$  infectious units (IU) per mL for each virus.

*Mouse imaging.* The University of California San Diego Institutional Animal Care and Use Committee approved the protocol. Albino C57BL/6 mice (Jackson Labs) were injected with  $2 \times 10^9$  infectious units of adenovirus via tail vein. After 5 days, belly fur was removed using a depilatory cream. Mice were imaged on a spectral imager (Maestro,

Cambridge Research Instruments). The IFP channel was excited with a 650/50 nm (center wavelength/full width at half maximum) bandpass filter with a 700 nm long pass filter in series with the imager's tunable emission filter at 710/40 nm. The mKate channel was 590/24 nm bandpass for excitation and 620/20 in series with 630/40 nm for emission. Images for GFP were acquired with 467/45nm excitation and a 515 nm long pass filter in series with the imager's 530/40 nm for emission. Images were taken with 3 seconds exposure. Images for Fig. 3A were acquired before BV and 1 hr after injection of 250 nanomoles of BV, then scaled so that the brightest pixels after BV administration would display at maximum intensity. mKate and GFP images were first scaled with the same parameters as the IFP images, then the mKate images were further brightened 5-fold to make them visible. For fluorescence time course measurement, background-subtracted images of averaged liver intensity of the same region over liver at different time points after 250 nmole biliverdin injection was divided by the fluorescence intensity after 1 hour (Image J, NIH).

For spectral deconvolution, an image cube was collected on the Maestro with excitation at 620/20 nm and emission at 650-800 nm taking an image every 10 nm. Fluorescence region and autofluorescence regions were identified and spectrally unmixed using the instrument's software, revealing true fluorescent protein signal (displayed in red) and autofluorescence (displayed in grey).

For fluorescence molecular tomographic imaging (FMT), an Ad5I infected mouse was anesthetized with ketamine and midazolam, then injected IV with 250 nmole biliverdin in 10% DMSO. One hour later, the mouse was placed in a FMT 2500 imaging system (VisEn Medical, Bedford MA) and imaged in channel 1 with Prosense 680

settings. Images were reconstructed and windowed (106 – 167 nM apparent concentrations depicted in blue to red pseudocolors) to show the 3D distribution of fluorescence viewed from two different angles (Fig. S9).

After sacrifice, the mice were dissected and imaged using both IFP and mKate filter sets at 3 levels during dissection: with the skin on, with the skin removed, and then with the peritoneum and rib cage removed. Using Image J software, regions of 80x300 pixels were selected from below the liver up to the mid thorax. These regions were analyzed by plotting the profile. The values were normalized by dividing each pixel by the average of the last 30 vertical pixels over the thorax. These data represent contrast of liver to adjacent thoracic background.

*Liver histology.* Livers were frozen for cryohistology to compare fluorescence protein signal strength and relative expression. Sections were cut at 10  $\mu\text{m}$  and then imaged on a fluorescence stereomicroscope (Lumar, Zeiss). Filter sets used were ex 470/40 nm and em 525/50 nm for GFP, ex 560/25 nm and em 607/36 for mKate, and ex 665/45 and em 725/50 for IFP. Images were acquired at 15s exposures for IFP and mKate channels and 3s exposure for the GFP channel, then displayed with intensity enhancements of 2, 1, and 1 respectively. Therefore the relative gains for the IFP, mKate, and GFP channels were 10, 5, and 1 respectively.

## **SOM Text**

*Evolution of IFP1.4.* Random mutagenesis of IFP1.1 with fluorescence activated cell sorting using a 676 nm laser resulted in IFP1.2 with 32% increase in quantum yield (QY),

due to an additional M54V mutation. However, the parent of IFP1.2, *DrCBD*, was previously shown to be a dimer. Multiple angle light scattering at 785 nm (Dawn 8+, Wyatt Technology, Santa Barbara CA) of IFP1.2 gave an apparent molecular weight 80 kDa, about twice the predicted monomeric size of 36.5 kDa, suggesting that IFP1.2 was also a dimer. To monomerize IFP1.2, Leu311 was rationally mutated to a lysine since it is in the hydrophobic dimer interface based on the crystal structure of *DrCBD* (Fig. S3). Size exclusion chromatography (SEC) showed that the resulted mutant (named as IFP1.3) was eluted later than IFP1.2 (Fig. S3B), suggesting that IFP1.3 is possibly a monomer. SEC of IFP1.2/IFP1.3 mixture confirmed the result (Fig. S3B). However, the QY of IFP1.3 was slightly decreased (8%). Another round of random mutagenesis and screening generated IFP1.4 with increased brightness. SEC (Fig. S2) and multiple angle light scattering at 12  $\mu$ M concentration (apparent molecular weight 41.5 kDa  $\pm$  10%) confirmed that IFP1.4 is monomeric. A sequence alignment of IFP1.4 with *DrCBD* is shown below with internal mutations shaded in blue. The S2A mutation (shaded in red) is to optimize the Kozak sequence when expressed in mammalian cells, and the C-terminal hexahistidine motif is to enable immobilized metal ion affinity chromatography.

|              |                                                                                                                   |     |
|--------------|-------------------------------------------------------------------------------------------------------------------|-----|
| <i>DrCBD</i> | MSRDPLPFFPPLYLGGPEITTENCEREPIHIPGSIQPHGALLTADGHSGEVLQMSLNAAT                                                      | 60  |
| IFP1.4       | M <sup>R</sup> RDPLPFFPPLYLGGPEITTENCEREPIHIPGSIQPHGALLTADGHSGEVLQ <sup>V</sup> SLNAAT                            | 60  |
| <i>DrCBD</i> | FLGQEPVLRGQTLAALLPEQWPALQAALPPGCPDALQYRATLDWPAAGHLSLTVHRVGE                                                       | 120 |
| IFP1.4       | FLGQEPVLRGQTLAALLPEQWPALQAALPPGCPDALQYRATLDWPAAGHLSLTVHRV <sup>A</sup> E                                          | 120 |
| <i>DrCBD</i> | LLILEFEPTEAWDSTGPHALRNAMFALESAPNLRALAEVATQTVRELTGFDRVMLYKFAP                                                      | 180 |
| IFP1.4       | LLILEFEPTEAWDS <sup>I</sup> GPHALRNAMFALESAPNLRALAEVATQTVRELTGFDRVMLYKFAP                                         | 180 |
| <i>DrCBD</i> | DATGEVIAEARREGLHAF LGHRFPASDIPAQARALYTRHLLRLTADTRAAAVPLDPVLNP                                                     | 240 |
| IFP1.4       | DATGEM <sup>I</sup> AEARREGM <sup>Q</sup> AFLGHRFPAS <sup>H</sup> T <sup>R</sup> PAQARALYTRHLLRLTADTRAAAVPLDPVLNP | 240 |
| <i>DrCBD</i> | QTNAPTPLGGAVLRATSPMHMQYLRNMGVSSLSVSVVVGGQLWGLIACHHQTYPYVLPDP                                                      | 300 |
| IFP1.4       | QTNAPTPLGGAVLRATSPMHMQYLRNMGVSSLSVSVVVGGQLWGLI <sup>V</sup> CHHQTYPYVLPDP                                         | 300 |
| <i>DrCBD</i> | LRTTLEYLGRLLSLQVQVKEA                                                                                             | 321 |
| IFP1.4       | LRTTLE <sup>E</sup> LGR <sup>K</sup> LS <sup>G</sup> QVQ <sup>R</sup> KEA <sup>E</sup> FFFFFFFFFF                 | 329 |

*Increase of cellular IFP fluorescence by exogenous BV.* HEK293A cells were transiently transfected with IFP1.4 in one 10-cm dish and incubated for 24 hours, trypsinized and replated into 5 wells of 6-well plate with ~ 400,000 cells per well. After another 24 hours incubation, different amounts of BV (final concentrations 5, 10, 20, 40  $\mu$ M) were added, followed by 90 minutes incubation. Then cells were trypsinized and washed with PBS and resuspended for fluorescence measurement by a 96-well plate reader with monochromators (Safire, TECAN). Untransfected HEK293A cells with additions of exogenous BV were used as controls. Infrared fluorescence of transfected HEK293A cells increased upon the increase of added exogenous BV concentration and was saturated at 20  $\mu$ M, while the untransfected cells did not show infrared fluorescence either with or without BV (Fig. S6A). Addition of exogenous BV rapidly (within 10 minutes) led to infrared fluorescence of matured P2 cortical neurons, two weeks after transfection of IFP1.1 (Fig. S6B), which were practically nonfluorescent before addition of BV.

*Half-life of IFP1.4.* Cycloheximide (30  $\mu$ g/ml final concentration) was added to HEK293A cells 24 hours after transfection of IFP1.4. Infrared fluorescence was fitted with single exponential decay assuming first-order decay kinetics of protein degradation (S5) (Figs. S7 and S8). The half-life of IFP1.4 in HEK293A cells with or without exogenous BV was calculated to be 4.44 and 3.61 hours, whose average is  $4.03 \pm 0.41$  hours.

*Multiple sequence alignment.* 130 bacteriophytochrome-like sequences from NCBI database are aligned using *DrCBD* as the query (*S6*). Readers are suggested to zoom in to read the alignment.

Query 1 MSRDpfpfpylpgpEITTCERCERPHIPGSIOPHGALLTADGHSQEVGLQMSLNAAT 60
NP 285374 1 ..... 60
FP 4818045 30 ..... 66
YP 569534 29 ..... 64
YP 533633 28 ..... 64
NP 442237 20 ..... 53
FP 01628825 12 ..... 53
NP 486939 11 ..... 53
YP 321522 12 ..... 53
FP 488044 7 ..... 48
FP 01459223 3 ..... 49
NP 948356 28 ..... 48
YP 569533 7 ..... 48
NP 779569 10 ..... 51
FP 01623500 17 ..... 51
YP 324352 10 ..... 51
NP 948355 15 ..... 50
FP 481797 10 ..... 51
YP 779570 28 ..... 64
FP 01630443 10 ..... 51
NP 00189423 15 ..... 51
FP 001463766 19 ..... 51
YP 001174646 14 ..... 52
FP 01461267 12 ..... 54
FP 01730981 7 ..... 52
NP 354963 9 ..... 47
YP 608942 13 ..... 51
YP 001668195 12 ..... 52
NP 001769101 16 ..... 52
FP 001748669 19 ..... 57
NP 744505 19 ..... 57
NP 945475 15 ..... 56
NP 001268649 12 ..... 50
NP 791225 10 ..... 52
YP 569510 15 ..... 56
YP 347894 15 ..... 52
FP 001464851 16 ..... 52
YP 600007 6 ..... 48
YP 236574 10 ..... 52
NP 792460 15 ..... 57
FP 275602 10 ..... 52
YP 262277 15 ..... 52
FP 01050418 25 ..... 67
FP 01623038 12 ..... 53
FP 01094090 8 ..... 62
NP 235462 20 ..... 55
NP 780275 18 ..... 55
NP 001906695 26 ..... 52
FP 8461991 10 ..... 52
FP 02008304 26 ..... 54
NP 001422444 14 ..... 54
NP 876783 12 ..... 53
FP 570910 10 ..... 57
NP 001203744 14 ..... 54
NP 001196150 12 ..... 57
FP 00147343 20 ..... 54
NP 8461991 10 ..... 52
FP 001361736 20 ..... 60
NP 001196265 12 ..... 52
NP 715500 20 ..... 58
FP 01227360 14 ..... 57
NP 252806 7 ..... 47
NP 789005 7 ..... 47
NP 001417343 20 ..... 53
FP 0097283 7 ..... 47
FP 02055103 182 ..... 218
NP 001641522 182 ..... 218
FP 00097488 7 ..... 47
NP 570862 18 ..... 45
NP 001239104 30 ..... 66
NP 01439288 24 ..... 60
FP 245299 13 ..... 49
NP 639488 13 ..... 49
NP 487589 18 ..... 49
NP 001770032 151 ..... 192
FP 001238408 4 ..... 45
NP 485786 15 ..... 49
NP 001346361 7 ..... 49
NP 198931 13 ..... 49
FP 365123 13 ..... 49
NP 355125 12 ..... 49
NP 644587 13 ..... 49
FP 01302507 17 ..... 57
FP 001170431 10 ..... 46
NP 001204102 5 ..... 46
NP 971319 14 ..... 45
FP 0117985 17 ..... 53
FP 01157401 11 ..... 53
NP 742336 14 ..... 52
NP 00998358 24 ..... 46
NP 946341 4 ..... 46
FP 611325 16 ..... 56
NP 001749437 6 ..... 48
NP 192038 26 ..... 40
NP 001668821 6 ..... 48
FP 01545930 11 ..... 48
NP 001523831 11 ..... 44
NP 745504 6 ..... 48
FP 345327 13 ..... 49
NP 001520152 5 ..... 48
NP 00126717 7 ..... 48
NP 345328 62 ..... 98
FP 001372987 7 ..... 48
NP 01011420 19 ..... 55
FP 01864718 7 ..... 48
FP 769292 12 ..... 48
FP 00208733 13 ..... 48
FP 01726549 7 ..... 49
NP 946838 30 ..... 59
FP 745313 24 ..... 59
FP 01041311 13 ..... 48
FP 01748188 18 ..... 54
FP 01109672 11 ..... 49
FP 01884592 12 ..... 48
FP 677848 11 ..... 46
FP 01110306 12 ..... 50
FP 01109728 15 ..... 50
FP 427322 17 ..... 53
FP 00514108 20 ..... 48
FP 01043109 10 ..... 53
FP 01051640 19 ..... 57
FP 01736013 12 ..... 46
FP 01446334 18 ..... 54





Qbery 121 LLLLEFEPTEAWDSTGPHLRNAMFALESAPNLRALAEVATQTVRELTFGDRVWMLYKAP 180  
NF 285374 121 ..... 180  
NF 488045 129 ..... 190  
NF 569534 129 ..... 190  
NF 533633 128 ..... 190  
NF 442377 117 ..... 180  
NF 01628825 117 ..... 180  
NF 486939 117 ..... 180  
NF 321522 117 ..... 180  
NF 486044 117 ..... 172  
NF 01459223 103 ..... 165  
NF 948356 128 ..... 189  
NF 569533 110 ..... 172  
NF 779569 114 ..... 176  
NF 01623500 118 ..... 181  
NF 324352 117 ..... 180  
NF 948355 113 ..... 175  
NF 487197 117 ..... 180  
NF 779570 128 ..... 179  
NF 01630443 117 ..... 180  
NF 001894923 121 ..... 180  
NF 001863766 117 ..... 180  
NF 001174646 117 ..... 179  
NF 01461267 118 ..... 181  
NF 01730981 118 ..... 181  
NF 354963 100 ..... 161  
NF 608942 117 ..... 177  
NF 001668195 116 ..... 180  
NF 001769151 117 ..... 181  
NF 001748669 123 ..... 187  
NF 744505 123 ..... 187  
NF 945475 119 ..... 182  
NF 001268649 119 ..... 182  
NF 791725 112 ..... 176  
NF 569510 119 ..... 182  
NF 347894 112 ..... 176  
NF 001864851 115 ..... 178  
NF 660007 133 ..... 196  
NF 236574 112 ..... 176  
NF 792460 117 ..... 176  
NF 275602 112 ..... 176  
NF 00516991 112 ..... 184  
NF 262277 112 ..... 176  
NF 01050418 123 ..... 184  
NF 01623038 118 ..... 181  
NF 01094090 115 ..... 178  
NF 234642 122 ..... 181  
NF 760275 26 ..... 176  
NF 001900695 115 ..... 178  
NF 861991 110 ..... 171  
NF 02008304 115 ..... 178  
NF 001242244 117 ..... 176  
NF 676783 112 ..... 173  
NF 570910 120 ..... 180  
NF 001203744 113 ..... 172  
NF 00196150 112 ..... 174  
NF 01061101 111 ..... 172  
NF 01884257 115 ..... 173  
NF 531190 112 ..... 172  
NF 487638 123 ..... 183  
NF 001135775 129 ..... 192  
NF 001236736 127 ..... 187  
NF 001962465 112 ..... 174  
NF 715500 123 ..... 186  
NF 01227360 114 ..... 176  
NF 01728373 97 ..... 120  
NF 252806 105 ..... 167  
NF 001417343 109 ..... 170  
NF 00973293 105 ..... 167  
NF 02055103 284 ..... 145  
NF 001641522 284 ..... 345  
NF 00967488 105 ..... 367  
NF 570862 126 ..... 173  
NF 001239104 128 ..... 188  
NF 01439288 124 ..... 184  
NF 245299 112 ..... 172  
NF 530488 112 ..... 172  
NF 487589 126 ..... 173  
NF 001770032 252 ..... 318  
NF 001238408 109 ..... 169  
NF 485786 109 ..... 170  
NF 001346361 105 ..... 172  
NF 198931 112 ..... 167  
NF 366123 112 ..... 172  
NF 355125 112 ..... 169  
NF 644587 112 ..... 172  
NF 01302507 121 ..... 180  
NF 001170431 107 ..... 167  
NF 001204102 109 ..... 169  
NF 971319 117 ..... 179  
NF 01017885 118 ..... 178  
NF 01157401 116 ..... 176  
NF 742336 115 ..... 175  
NF 00998358 124 ..... 185  
NF 946341 109 ..... 169  
NF 611325 121 ..... 179  
NF 001749437 110 ..... 169  
NF 192038 116 ..... 178  
NF 001668821 110 ..... 169  
NF 01549310 109 ..... 169  
NF 001523831 110 ..... 178  
NF 745504 110 ..... 169  
NF 345327 110 ..... 170  
NF 001520152 109 ..... 171  
NF 001267717 110 ..... 169  
NF 345384 159 ..... 219  
NF 001372987 112 ..... 174  
NF 01011420 119 ..... 178  
NF 01864718 112 ..... 172  
NF 769292 112 ..... 172  
NF 00208733 108 ..... 172  
NF 01726549 119 ..... 184  
NF 946838 122 ..... 182  
NF 745313 125 ..... 187  
NF 01041311 112 ..... 172  
NF 01748188 118 ..... 178  
NF 01109672 117 ..... 182  
NF 01884592 111 ..... 174  
NF 677848 108 ..... 171  
NF 01110306 121 ..... 172  
NF 01109728 114 ..... 187  
NF 427322 115 ..... 176  
NF 00514108 109 ..... 172  
NF 01043109 114 ..... 174  
NF 01051640 119 ..... 180  
NF 01746013 97 ..... 175  
NF 0051672 112 ..... 184  
NF 01446334 118 ..... 178  
NF 478662 3 ..... 58







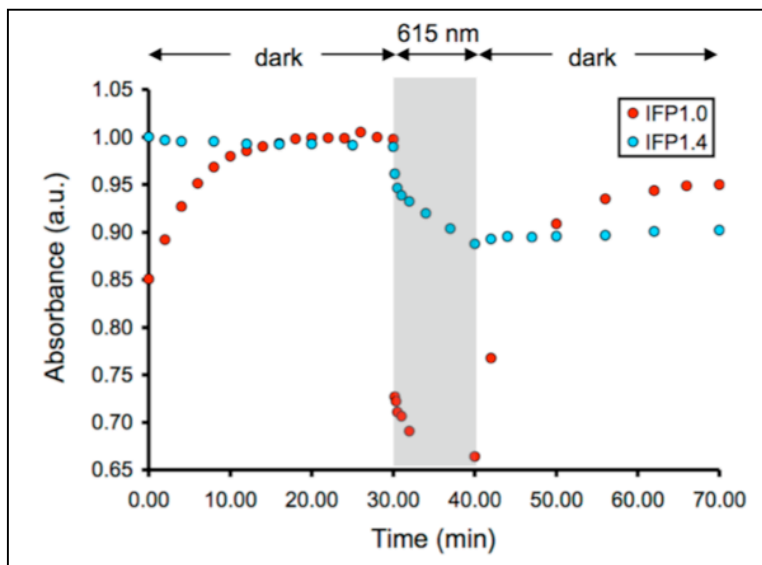

**Fig. S1** Dark and light adapted behavior of IFP1.0 and IFP1.4. Absorbance spectra at different time points were taken in the dark (0 – 30 min.), upon 615 nm light illumination by solar simulator (30 – 40 min.), and then in the dark again (40 – 70 min.).

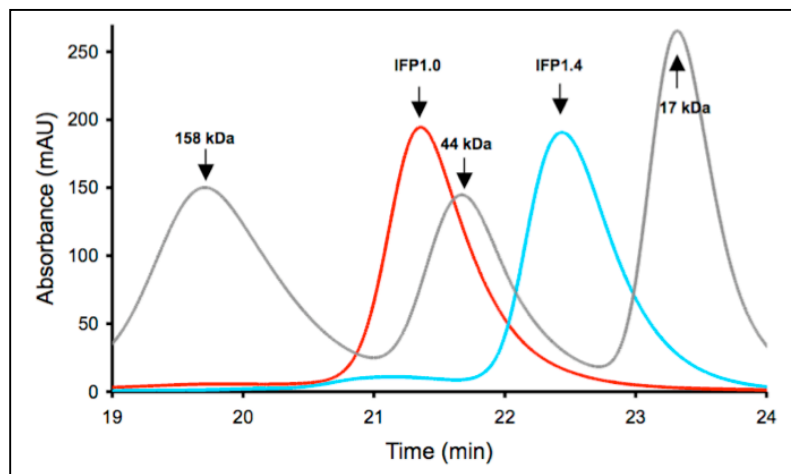

**Fig. S2** Size exclusion chromatography of IFP1.0 and 1.4. Three standards are also shown:  $\gamma$ -globulin (158 kDa), ovalbumin (44 kDa) and myoglobin (17 kDa). Absorbance was measured at 280 nm.

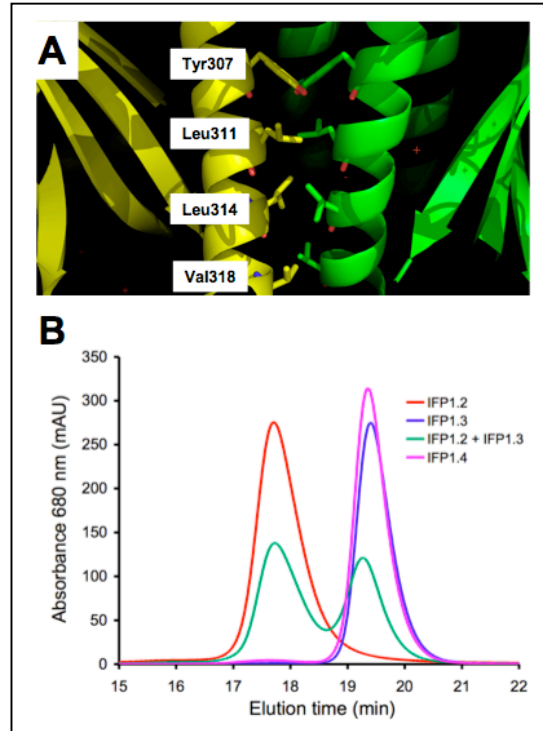

**Fig. S3** IFP monomerization by L311K mutation. **(A)** The dimer interface in DrCBD is formed from 4 residues (Y307/L311/L314/V318). **(B)** Size exclusion chromatography of IFP1.2, 1.3, 1.4 and a mixture of IFP1.2 and 1.3.

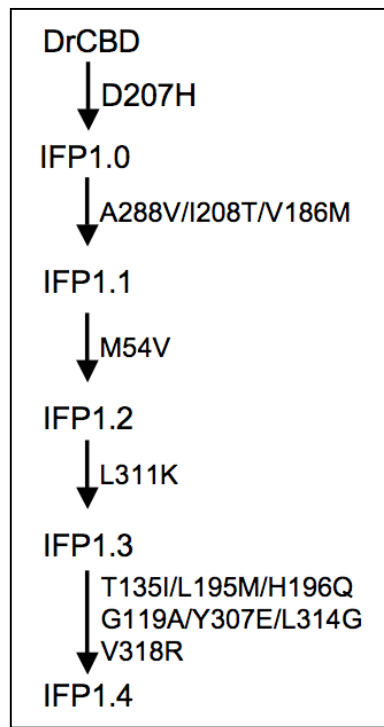

**Fig. S4** Evolution of IFPs showing the mutations introduced at each stage. .

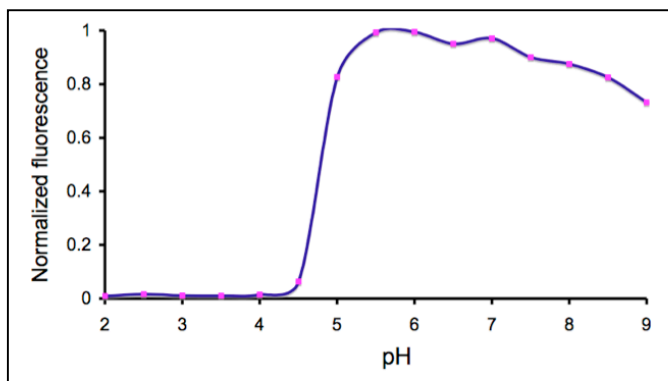

**Fig. S5** pH dependence of IFP1.4 fluorescence. IFP1.4 was excited at 640 nm and its emission at 700 - 800 nm was integrated, normalized and plotted against pH.

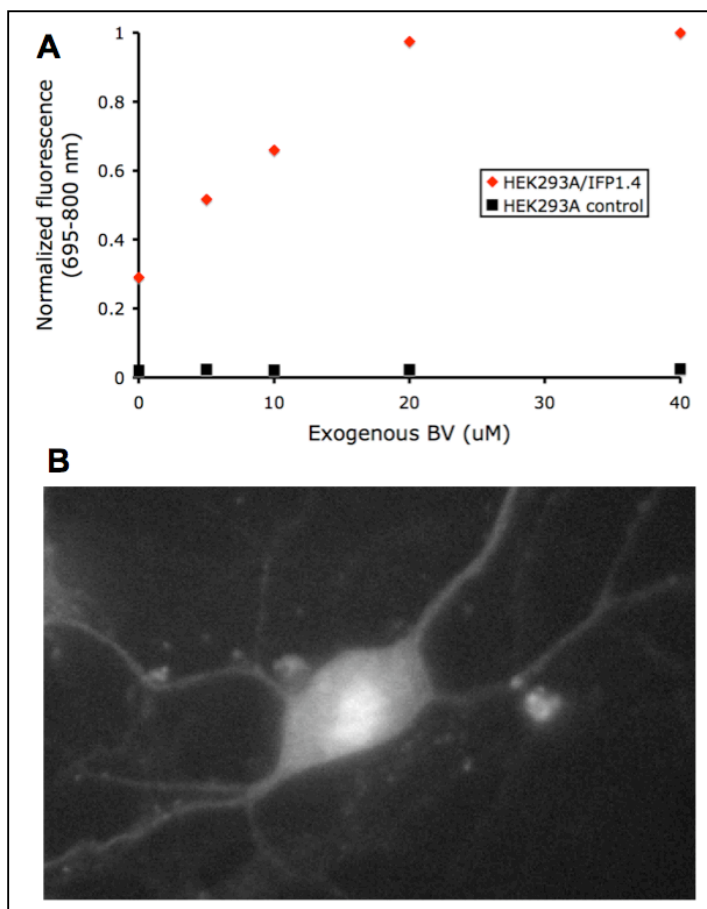

**Fig. S6** Increase of IFP fluorescence by addition of exogenous BV. (A) IFP1.4-transfected HEK293A cells indicated increase of fluorescence upon addition of exogenous BV, with untransfected cells as the control. IFP fluorescence was integrated from 695 to 800 nm upon excitation at 660 nm. (B) Fluorescence image of a P2 cultured cortical neuron 2 weeks after transfection of IFP1.1, 10 minutes after addition of 25 uM BV.



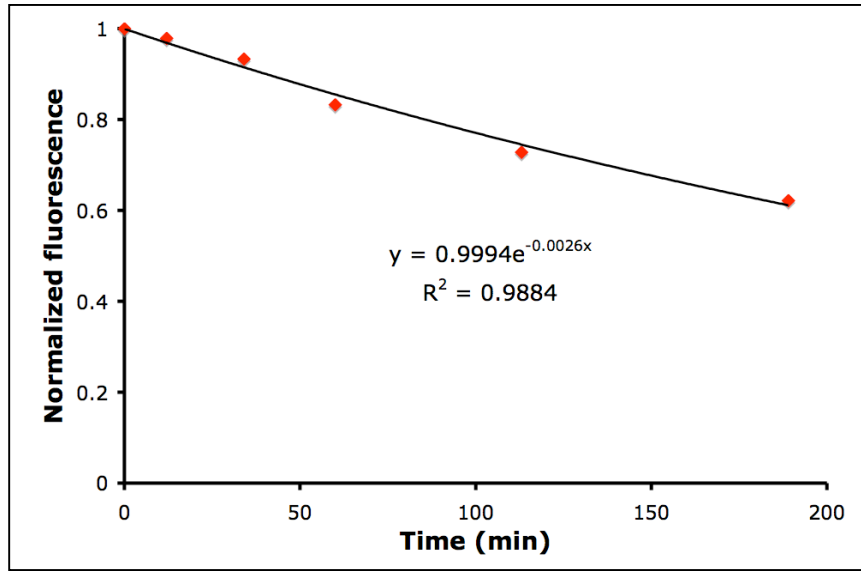

Fig. S7 IFP1.4 degradation in HEK293A cells with 20uM BV added.

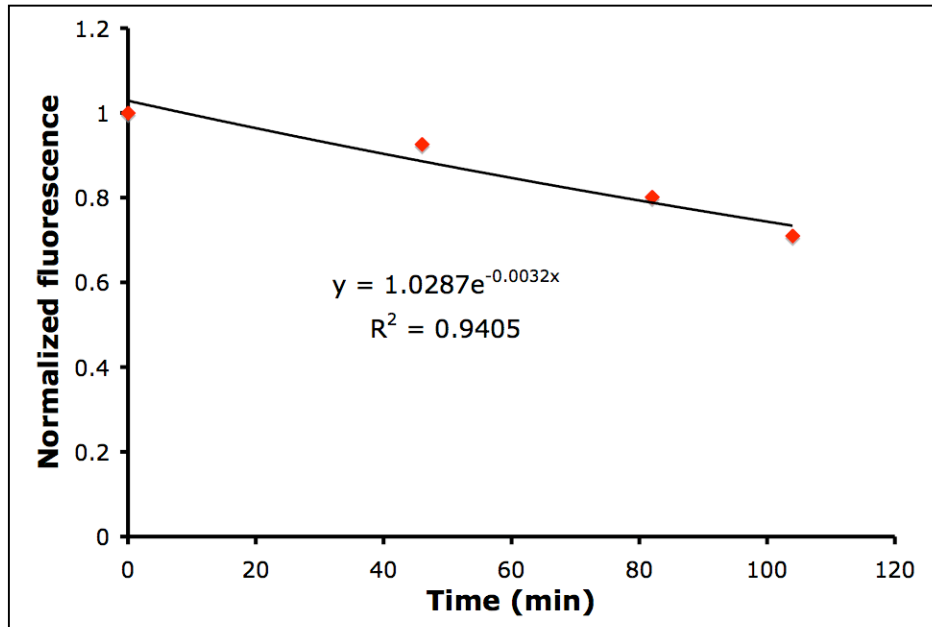

Fig. S8 IFP1.4 degradation in HEK293A cells without exogenous BV.

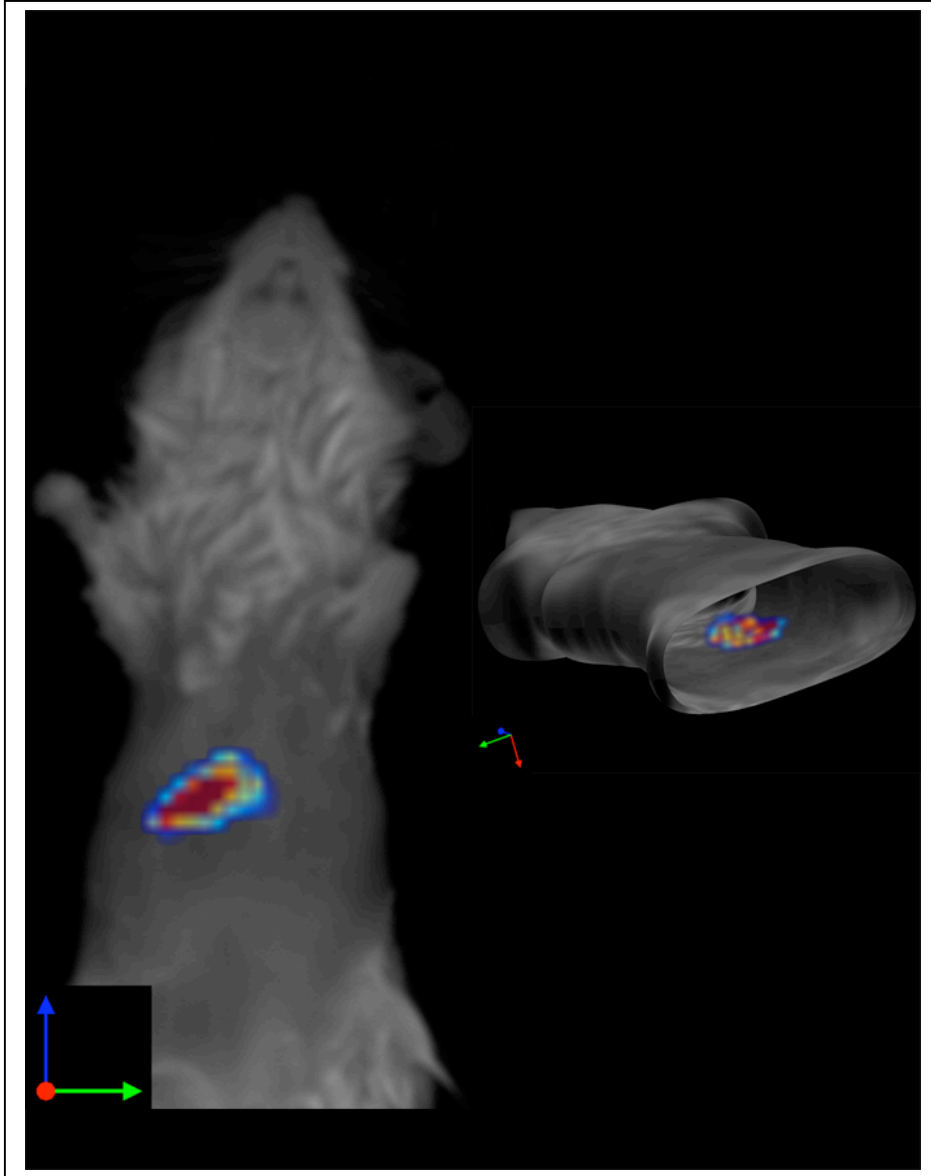

**Fig. S9** Noninvasive fluorescence molecular tomographic (FMT) imaging of IFP-expressing mouse liver. Blue, green, and red arrows indicate rostral-caudal, left-right, and dorsoventral axes respectively. Left: top view. Right: tilted view to show the 3D localization of fluorescence within the mouse.

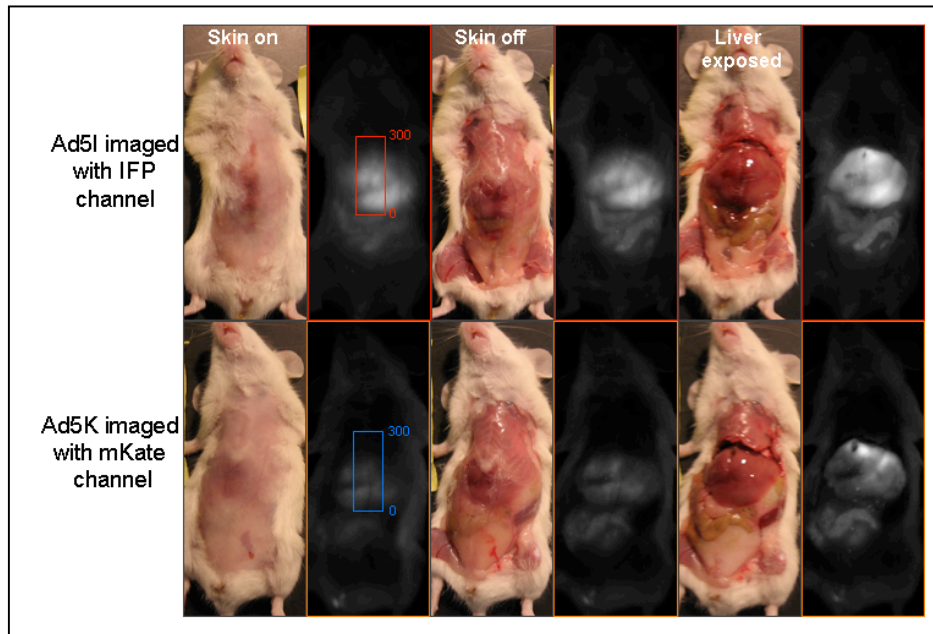

**Fig. S10** IFP/mKate fluorescence images before dissection (skin on), after removal of skin (skin off), and after removal of overlying peritoneum and ribcage (liver exposed). mKate images were 2.5X brightened relative to IFP images. Note that Ad5I infected mouse was imaged after 250 nmole IV injection of BV.

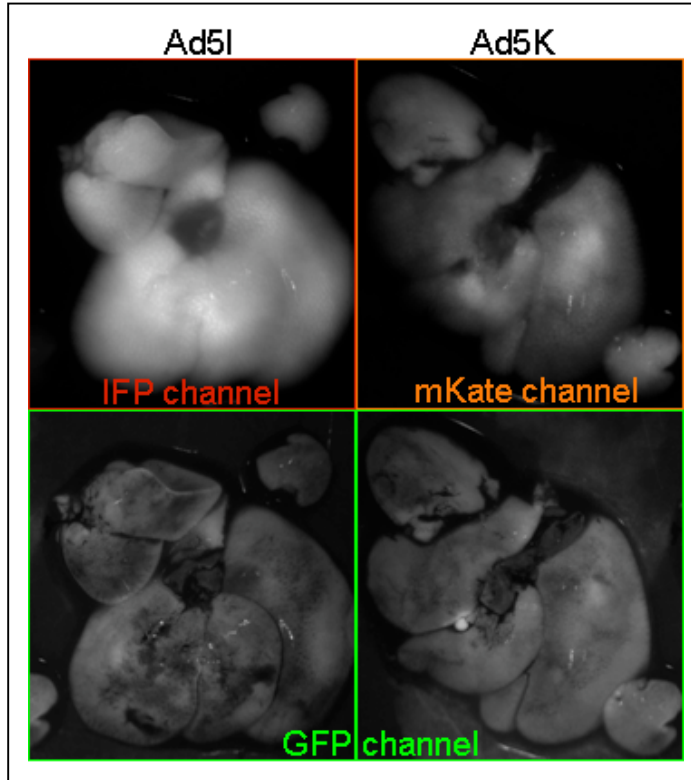

**Fig. S11** Imaging of extracted livers infected with Ad5I and Ad5K.

**Table S1 Properties of infrared fluorescent protein variants.**

| Fluorescent protein | Absorption max. (nm) | Extinct. coeff. ( $M^{-1} \text{ cm}^{-1}$ ) | Emission max. (nm) | Quantum yield | Relative brightness (%) | Stoichiometry |
|---------------------|----------------------|----------------------------------------------|--------------------|---------------|-------------------------|---------------|
| IFP1.0              | 699                  | 60,000                                       | 722                | 0.028         | 100                     | Dimer         |
| IFP1.1              | 686                  | 86,000                                       | 713                | 0.050         | 256                     | Dimer         |
| IFP1.2              | 684                  | 86,000                                       | 707                | 0.066         | 338                     | Dimer         |
| IFP1.3              | 684                  | 84,000                                       | 707                | 0.061         | 305                     | Monomer       |
| IFP1.4              | 684                  | 92,000                                       | 708                | 0.070         | 383                     | Monomer       |

## Supporting References

- S1. W. P. C. Stemmer, A. Cramer, K. D. Ha, T. M. Brennan, H. L. Heyneker, *Gene* **164**, 49 (1995).
- S2. N. C. Shaner *et al.*, *Nat. Biotechnol.* **22**, 1567 (2004).
- S3. W. P. C. Stemmer, *Nature* **370**, 389 (1994).
- S4. R. B. Mujumdar, L. A. Ernst, S. R. Mujumdar, C. J. Lewis, A. S. Waggoner, *Bioconjug. Chem.* **4**, 105 (1993).
- S5. A. Belle, A. Tanay, L. Bitincka, R. Shamir, E. K. O'Shea, *Proc. Natl. Acad. Sci. U.S.A.* **103**, 13004 (2006).
- S6. S. F. Altschul *et al.*, *Nucleic Acids Res.* **25**, 3389 (1997)
